# Supplementary material for: Probing into the mechanisms of disinfection by-product formation from natural organic matter and model compounds after UV/chlorine treatment
Source: Royal Society of Chemistry journal article supplement (doi:10.1039/d3ew00065f), 2023-01-01
Supplement: d3ew00065f1.pdf [file d3ew00065f1.pdf]

## Supplementary Materials

### **Probing into the mechanisms of disinfection byproduct formation from natural organic matter and model compounds after UV/chlorine treatment**

Ding Wang<sup>a,b,1</sup>, Zhechao Hua<sup>a,1</sup>, Yonglin Cui<sup>a</sup>, Zijun Dong<sup>c</sup>, Chen Li<sup>d</sup>, Jingyun Fang<sup>a,\*</sup>

<sup>a</sup> Guangdong Provincial Key Laboratory of Environmental Pollution Control and Remediation Technology, School of Environmental Science and Engineering, Sun Yat-sen University, Guangzhou, 510275, China

<sup>b</sup> General Institute of Water Resources and Hydropower Planning and Design, Beijing 100120, China

<sup>c</sup> College of Civil and Transportation Engineering, the Underground Polis Academy, Shenzhen University, Shenzhen 518048, China

<sup>d</sup> Jiangsu Academy of Environmental Industry and Technology Corp., Nanjing 210019, China

\* Corresponding author. E-mail: [fangjy3@mail.sysu.edu.cn](mailto:fangjy3@mail.sysu.edu.cn)

<sup>1</sup> Shared first authorship.

## Lists of Captions

- Table S1.** Rate constants of NOM and model compounds with chlorine and radicals at pH 7.0. .3
- Table S2.** Alteration of UV absorbance at 254 nm ( $UV_{254}$ ), DOC concentration and specific UV absorbance (SUVA) of NOM after chlorination, UV/chlorine and UV treatments.....4
- Figure S1.** Chlorine residuals after 10 min UV, chlorination and UV/chlorine treatment, and 24 h post chlorination. Conditions: [NOM] = 3 mg/L, [model compounds] = 50  $\mu$ M, [chlorine] = 15 mg/L for NOM, 300  $\mu$ M for benzoate, methylamine, and dimethylamine, 500  $\mu$ M for phenol, resorcinol, and asparagine, and 750  $\mu$ M for tyrosine, pH = 7.0.....5
- Figure S2.** The contributions of reactive species to NOM transformation in the UV/chlorine process. Conditions: [NOM] = 3 mg/L, [chlorine] = 15 mg/L, pH = 7.0. ....6
- Figure S3.** The degradation of phenol and the formation of chlorophenols in chlorination (a) and UV/chlorine process (b). Conditions: [phenol] = 50  $\mu$ M, [chlorine] = 500  $\mu$ M, pH = 7.0. ....7
- Figure S4.** The formation of methylamine from dimethylamine during UV/chlorine treatment. Conditions: [dimethylamine]<sub>0</sub> = 50  $\mu$ M, [chlorine] = 300  $\mu$ M, pH = 7.0. ....8

**Table S1.** Rate constants of NOM and model compounds with free chlorine and radicals at pH 7.0.

| □             | $k_{\text{chlorine}}$ ( $\text{M}^{-1} \text{s}^{-1}$ ) | $k_{\text{HO}\cdot}$ ( $\text{M}^{-1} \text{s}^{-1}$ ) | $k_{\text{Cl}\cdot}$ ( $\text{M}^{-1} \text{s}^{-1}$ ) | $k_{\text{Cl}_2\cdot^-}$ ( $\text{M}^{-1} \text{s}^{-1}$ ) | $k_{\text{ClO}\cdot}$ ( $\text{M}^{-1} \text{s}^{-1}$ ) |
|---------------|---------------------------------------------------------|--------------------------------------------------------|--------------------------------------------------------|------------------------------------------------------------|---------------------------------------------------------|
| NOM           | 2.4 [1]                                                 | $3 \times 10^8$ [2]                                    | $1.6 \times 10^8$ [2]                                  | $1.7 \times 10^7$ [2]                                      | $5.4 \times 10^8$ [3]                                   |
| Phenol        | 18 [4]                                                  | $6.6 \times 10^9$ [5]                                  | $1.1 \times 10^{10}$ [5]                               | $3.2 \times 10^8$ [5]                                      | $3.4 \times 10^6$ b                                     |
| Resorcinol    | $4 \times 10^3$ [4]                                     | $1.2 \times 10^{10}$ [6]                               | $1.4 \times 10^{10}$ a                                 | $8.6 \times 10^9$ a                                        | $2.2 \times 10^6$ b                                     |
| Benzoic acid  | Negligible [4]                                          | $5.9 \times 10^9$ [7]                                  | $1.8 \times 10^{10}$ [7]                               | $2 \times 10^6$ [7]                                        | $< 1 \times 10^6$ [7]                                   |
| Methylamine   | $3.2 \times 10^4$ [4]                                   | N.D.                                                   | N.D.                                                   | N.D.                                                       | N.D.                                                    |
| Dimethylamine | $8.9 \times 10^3$ [4]                                   | N.D.                                                   | N.D.                                                   | N.D.                                                       | N.D.                                                    |
| Tyrosine      | $\sim 1 \times 10^4$ [4]                                | $1.3 \times 10^{10}$ [6]                               | $1.2 \times 10^{10}$ a                                 | $4.6 \times 10^8$ a                                        | N.D.                                                    |
| Asparagine    | $\sim 1 \times 10^4$ [4]                                | $4.9 \times 10^7$ [6]                                  | $7.2 \times 10^8$ a                                    | Negligible a                                               | N.D.                                                    |

N.D. = Not determined.

<sup>a</sup> Determined in this study.

<sup>b</sup> Assumed in this study.

**Table S2.** Alteration of UV absorbance at 254 nm ( $UV_{254}$ ), DOC concentration and specific UV absorbance (SUVA) of NOM after chlorination, UV/chlorine and UV treatments.

| □             | $UV_{254}$ ( $cm^{-1}$ ) | DOC (mg/L) | SUVA (L/mg/m) |
|---------------|--------------------------|------------|---------------|
| Untreated NOM | 0.1112                   | 3          | 3.7           |
| Chlorination  | 0.0892                   | 2.7        | 3.3           |
| UV/chlorine   | 0.0456                   | 2.4        | 1.9           |
| UV            | 0.1063                   | 2.9        | 3.7           |

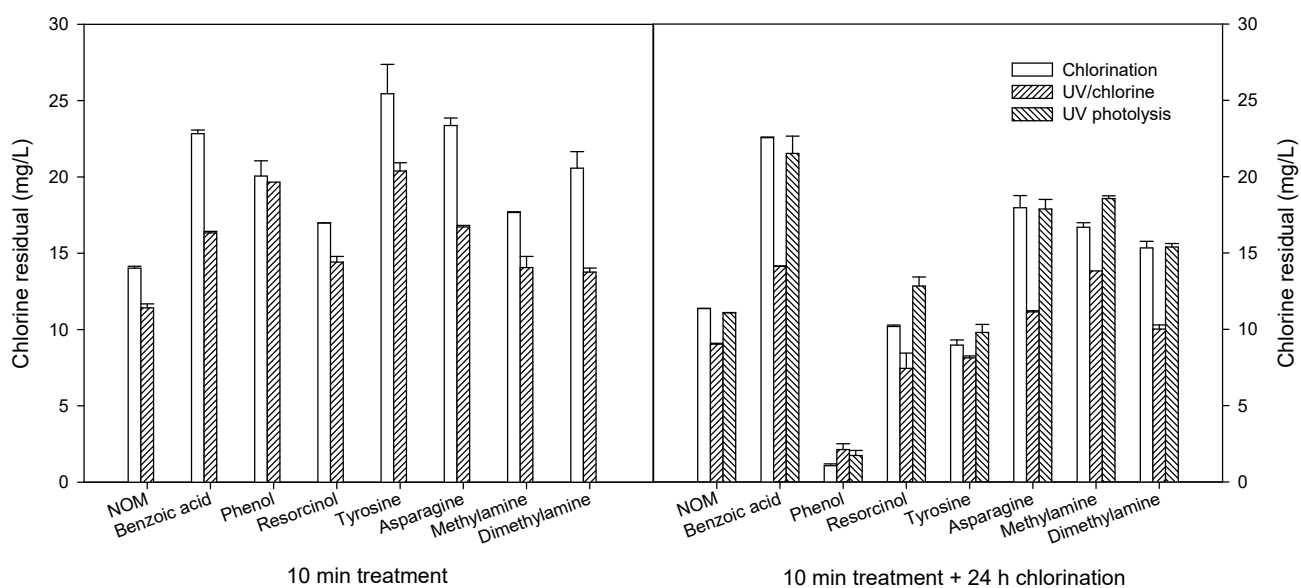

**Figure S1.** Chlorine residuals after 10 min UV, chlorination and UV/chlorine treatment, and 24 h post chlorination. Conditions: [NOM] = 3 mg/L, [model compounds] = 50  $\mu$ M, [chlorine] = 15 mg/L for NOM, 300  $\mu$ M for benzoate, methylamine, and dimethylamine, 500  $\mu$ M for phenol, resorcinol, and asparagine, and 750  $\mu$ M for tyrosine, pH = 7.0.

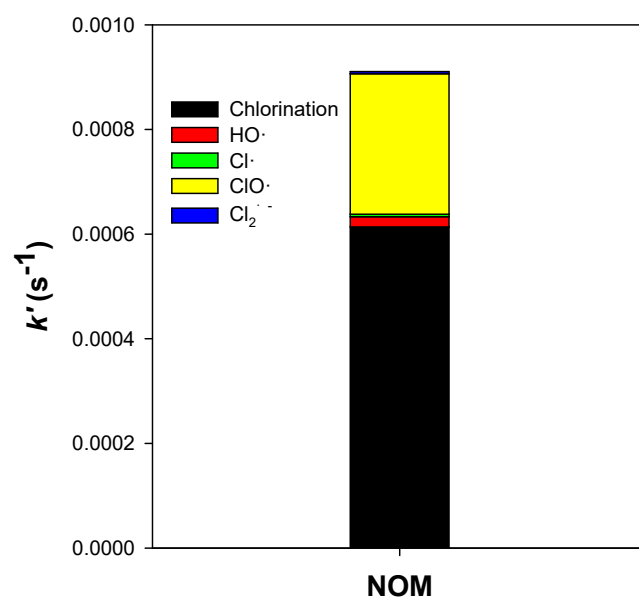

**Figure S2.** The contributions of reactive species to NOM transformation in the UV/chlorine process.

Conditions: [NOM] = 3 mg/L, [chlorine] = 15 mg/L, pH = 7.0.

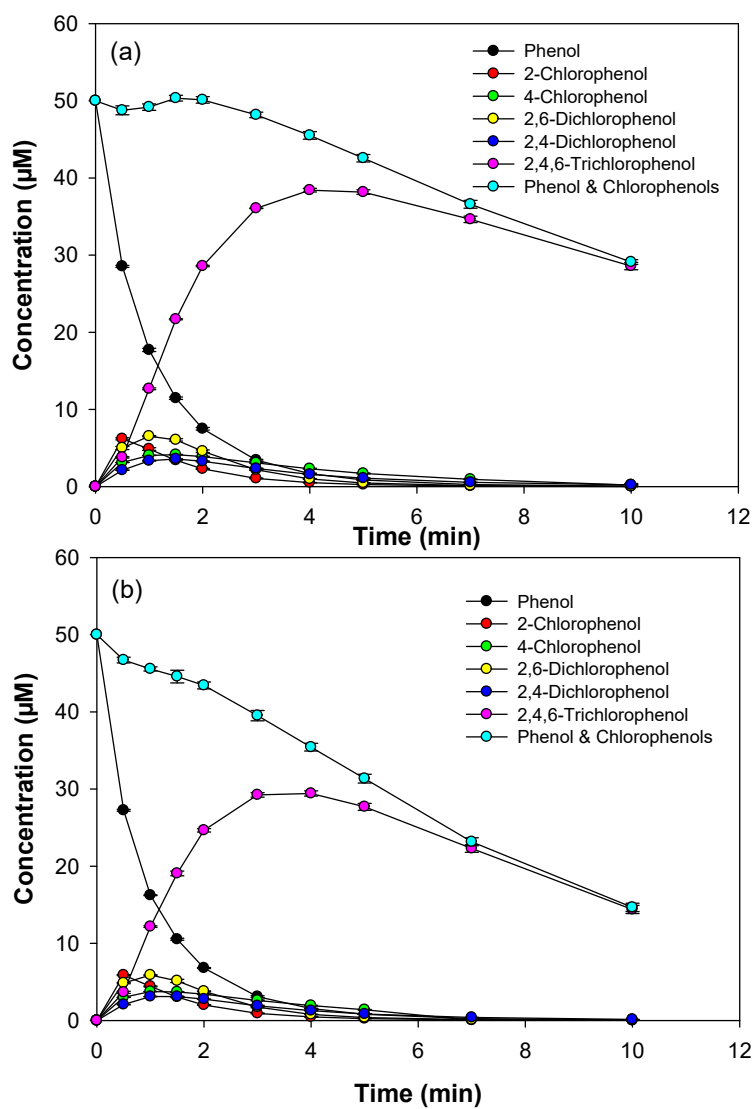

**Figure S3.** The degradation of phenol and the formation of chlorophenols in chlorination (a) and UV/chlorine process (b). Conditions: [phenol] = 50 μM, [chlorine] = 500 μM, pH = 7.0.

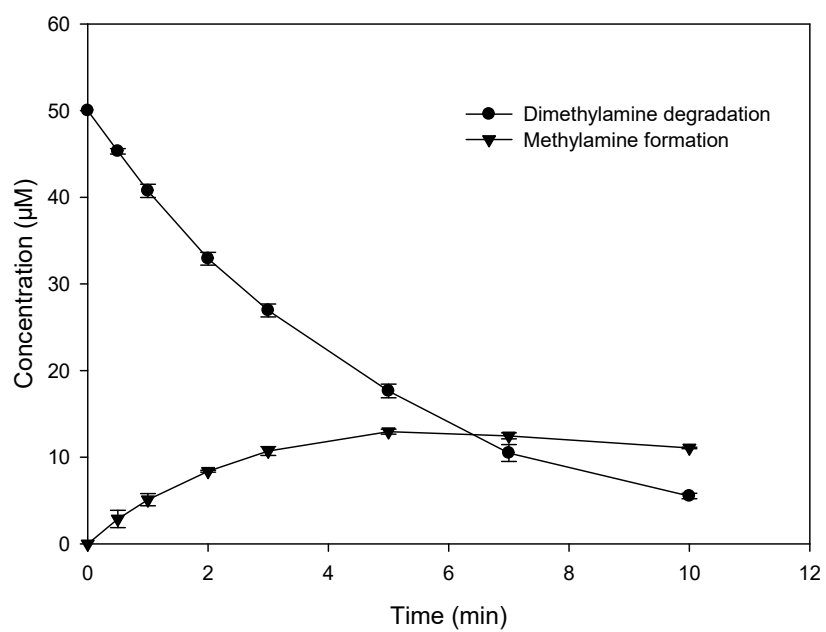

**Figure S4.** The formation of methylamine from dimethylamine during UV/chlorine treatment.

Conditions: [dimethylamine]<sub>0</sub> = 50 μM, [chlorine] = 300 μM, pH = 7.0.



## References

- (1) Westerhoff, P.; Chao, P.; Mash, H., Reactivity of natural organic matter with aqueous chlorine and bromine, *Water Res.*, 2004, **38**, 1502-1513.
- (2) Lei, Y.; Lei, X.; Westerhoff, P.; Zhang, X.; Yang, X., Reactivity of chlorine radicals ( $\text{Cl}\cdot$  and  $\text{Cl}_2^{\cdot-}$ ) with dissolved organic matter and the formation of chlorinated byproducts, *Environ. Sci. Technol.*, 2021, **55**, 689-699.
- (3) Guo, K.; Wu, Z.; Shang, C.; Yao, B.; Hou, S.; Yang, X.; Song, W.; Fang, J., Radical chemistry and structural relationships of PPCP degradation by UV/chlorine treatment in simulated drinking water, *Environ. Sci. Technol.*, 2017, **51**, 10431-10439.
- (4) Deborde, M.; von Gunten, U., Reactions of chlorine with inorganic and organic compounds during water treatment – Kinetics and mechanisms: A critical review, *Water Res.*, 2008, **42**, 13-51.
- (5) Lei, Y.; Cheng, S.; Luo, N.; Yang, X.; An, T., Rate constants and mechanisms of the reactions of  $\text{Cl}\cdot$  and  $\text{Cl}_2^{\cdot-}$  with trace organic contaminants, *Environ. Sci. Technol.*, 2019, **53**, 11170-11182.
- (6) NIST, <http://www3.nd.edu/~ndrlrcdc/index.html> (Accessed March 29, 2020). 2020.
- (7) Fang, J.; Fu, Y.; Shang, C., The roles of reactive species in micropollutant degradation in the UV/free chlorine system, *Environ. Sci. Technol.*, 2014, **48**, 1859-1868.
